# Supplementary material for: Part B: Improvement of the Optical Properties of Cellulose Nanocrystals Reinforced Thermoplastic Starch Bio-Composite Films by Ex Situ Incorporation of Green Silver Nanoparticles from Chaetomorpha linum
Source: MDPI journal article supplement (doi:10.3390/polym15092148), 2023-04-30
Supplement: s1 [file s1]

## Supplementary Information

### Part B: Improvement of the Optical Properties of Cellulose Nanocrystals Reinforced Thermoplastic Starch Bio-Composite Films by Ex Situ Incorporation of Green Silver Nanoparticles from *Chaetomorpha linum*

Nour Houda M'sakni <sup>1,2,\*†</sup> and Taghreed Alsufyani <sup>1,\*†</sup>

<sup>1</sup> Department of Chemistry, College of Science, Taif University, P.O. Box 11099, Taif 21944, Saudi Arabia

<sup>2</sup> Laboratory of Interfaces and Advanced Materials (LIMA), Faculty of science, Monastir University, Monastir 5019, Tunisia

\* Correspondence: [nour.h@tu.edu.sa](mailto:nour.h@tu.edu.sa) (N.H.M.); [taghreed.alsufyani@tu.edu.sa](mailto:taghreed.alsufyani@tu.edu.sa) (T.A.)

† These authors contributed equally to this work.

## Supplementary Tables

Supplementary Table 1. Assignment of bands found in FTIR spectra of different isolated water extract, silver nanoparticles and bio-nanocomposite

|                                                                                                                            | Main peak (cm <sup>-1</sup> ) from<br>isolated water extract, silver nanoparticles and bio-nanocomposite |       |                          |       |                          |       |                          |                |
|----------------------------------------------------------------------------------------------------------------------------|----------------------------------------------------------------------------------------------------------|-------|--------------------------|-------|--------------------------|-------|--------------------------|----------------|
|                                                                                                                            | CL-W                                                                                                     |       | CL-WE                    |       | CL-WE-AgNp               |       | CS-CL-CNC-AgNP 20%       |                |
|                                                                                                                            | Peak (cm <sup>-1</sup> )                                                                                 | % T   | Peak (cm <sup>-1</sup> ) | % T   | Peak (cm <sup>-1</sup> ) | % T   | Peak (cm <sup>-1</sup> ) | % T            |
| O-H stretching from water molecules                                                                                        | 3338.27                                                                                                  | 96.45 | 3313.79                  | 96.14 | 3350.51                  | 91.05 | 3321                     | 91.92          |
|                                                                                                                            | 3279.10                                                                                                  | 96.56 | 3275.01                  | 97.12 | 3279.10                  | 90.88 | -                        | -              |
| C-H stretching<br>Lipid – carbohydrate Mainly vas<br>) stretching <sub>3</sub> (CH <sub>2</sub> ) and <i>vs.</i> (CH       | 2938.33                                                                                                  | 96.42 | 2948.8                   | 96.42 | -                        | -     | 2942                     | 93.30          |
|                                                                                                                            | 2909.76                                                                                                  | 94.75 | 2913.00                  | 96.95 | 2922.00                  | 90.80 |                          |                |
|                                                                                                                            | 2842.43                                                                                                  | 95.70 | 2862.83                  | 96.86 | 2870.99                  | 91.69 | 2709<br>2532             | 93.70<br>94.10 |
| stretching vibrations of the C=N chain<br>of Nitrile compounds [53]<br>(Subrhamanian, Suriyamoorthy, &<br>Rajasekar, 2017) | 2297                                                                                                     | 97.04 | -                        | -     | -                        | -     | -                        | -              |
|                                                                                                                            | -                                                                                                        | -     | -                        | -     | -                        | -     | 1787                     | 96.88          |
|                                                                                                                            | -                                                                                                        | -     | -                        | -     | -                        | -     | 1642                     | 98.60          |
| Amide I from proteins<br>Stretching vibration of the (NH) C=O<br>group                                                     | 1644.7                                                                                                   | 89.27 | 1644.60                  | 91.86 | 1640.61                  | 84.37 | 1608                     | 96.76          |
| Amide II from proteins                                                                                                     | 1538.54                                                                                                  | 88.65 | 1544.66                  | 93.11 | 1524.26                  | 85.09 | 1597                     | 96.38          |
| C=C-C, Aromatic ring stretch,<br>Aromatic compound                                                                         | -                                                                                                        | -     | -                        | -     | 1467.12                  | 86.06 | 1434                     | 85.76          |
| O-H bend, Alcoholic group                                                                                                  | 1412.03                                                                                                  | 87.04 | 1414.07                  | 96.14 | 1416.11                  | 86.42 | 1348                     | 85.60          |
| Asymmetric stretching vibration of<br>sulfate groups                                                                       | 1224.30                                                                                                  | 85.43 | 1220.22                  | 91.58 | 1218.18                  | 80.61 | 1218                     | 92.62          |
| Stretching vibrations of the glycosidic<br>C—O bond                                                                        | -                                                                                                        | -     | -                        | -     | 1132.48                  | 87.04 | 1154                     | 84.98          |
|                                                                                                                            | 1095                                                                                                     | 88.91 | 1079.39                  | 90.08 | -                        | -     | -                        | -              |

|                                                                                                                                                                                                      |         |       |         |       |        |       |      |       |
|------------------------------------------------------------------------------------------------------------------------------------------------------------------------------------------------------|---------|-------|---------|-------|--------|-------|------|-------|
| v (C-O-C) stretches from carbohydrates                                                                                                                                                               |         |       |         |       |        |       |      |       |
| Sulfate groups as S = O, C-O-S and v(C-S-C) of sulphated polysaccharides [55] (Trabelsi, M'sakni, Ouada, Bacha, & Roudesli, 2009)                                                                    | 1046.78 | 86.06 | 1044.74 | 89.10 | -      | -     | -    | -     |
| $\delta$ (C-O-H) deformation, v (C-O-C) stretches of polysaccharides from carbohydrates, $\nu_s$ (P=O) symmetric stretches from nucleic acid                                                         | 1003.93 | 84.26 | 1001.93 | 91.14 | 991.68 | 69.28 | 1018 | 75.86 |
| P-O-C stretch, Aromatic phosphates                                                                                                                                                                   | 924.35  | 84.90 | -       | 93.64 | -      | -     | -    | -     |
| the bands at 827 cm <sup>-1</sup> and 887 cm <sup>-1</sup> indicated the coexistence of $\alpha$ and $\beta$ -configurations of the sugar units [51,52] (Harshal & Lalitha, 2014; Tang et al., 2020) | 863.13  | 97.85 | 865.17  | 92.75 | 869.25 | 77.49 | 879  | 84.58 |
| bending band of N-H and C-N from the amide III band                                                                                                                                                  | 838.6   | 86.68 | 832.52  | 92.75 | 822.32 | 78.56 | -    | -     |
| Vibration of C-O bonds for an epoxy function                                                                                                                                                         | 706.01  | 84.45 | 703.97  | 90.25 | -      | -     | -    | -     |
| C-Cl stretching, Aliphatic Chloro compound                                                                                                                                                           | 644.8   | 81.42 | -       | 89.99 | -      | -     | -    | -     |
| C-Br stretching, Aliphatic bromo compounds                                                                                                                                                           | 614.19  | 80.17 | -       | 87.40 | -      | -     | -    | -     |
